# Supplementary material
Source: PubMed Central journal article supplement (PMC4117823)
Supplement: NIHMS585691-supplement-Supplemental_Table_1.pdf [file NIHMS585691-supplement-Supplemental_Table_1.pdf]

| <b>Donor</b> | <b>AGE</b> | <b>SEX</b> | <b>WEIGHT<br/>(lb)</b> | <b>HEIGHT<br/>(in)</b> | <b>BMI</b> |
|--------------|------------|------------|------------------------|------------------------|------------|
| 1            | 57         | Female     | 140                    | 61                     | 26.4       |
| 2            | 52         | Male       | 197                    | 70                     | 28.3       |
| 3            | 21         | Male       | 176                    | 76                     | 21.4       |

**SUPPLEMENTAL TABLE 1.** Characteristics of three human organ donors whose stomachs were studied for lineage geography.
