# Supplementary material
Source: PubMed Central journal article supplement (PMC4117823)
Supplement: NIHMS585691-supplement-Supplemental_Table_2.pdf [file NIHMS585691-supplement-Supplemental_Table_2.pdf]

| <b>MARKER</b>           | <b>LINEAGE</b>                                       | <b>SOURCE</b>                                     | <b>DILUTION</b>         |
|-------------------------|------------------------------------------------------|---------------------------------------------------|-------------------------|
| H/K-ATPase              | Parietal cells                                       | Fitzgerald,<br>10R-H100b                          | 1:10,000 or<br>1:50,000 |
| Mist1                   | Chief cells                                          | Gift from Jason<br>Mills, Wash. U.,<br>St. Louis  | 1:2,000                 |
| Muc5AC                  | Surface cells                                        | NeoMarkers,<br>MS-551-P                           | 1:500                   |
| MUC6                    | Mucous neck cells<br>and deep antral<br>mucous cells | Kanto Chemical,<br>25503-96                       | 1:500                   |
| Chromogranin A          | Enteroendocrine<br>cells                             | AbD Serotec,<br>MCA845                            | 1:200                   |
| Somatostatin            | D cells                                              | DAKO, A0566                                       | 1:200                   |
| Serotonin               | EC cells                                             | Abcam, ab16007                                    | 1:100                   |
| Gastrin                 | G cells                                              | BioGenex,<br>AR019-5R                             | 1:100                   |
| Ghrelin                 | X cells                                              | Phoenix<br>Pharmaceuticals,<br>H-031-31           | 1:10,000                |
| Histadine decarboxylase | ECL cells                                            | Fitzgerald,<br>20R-HP001                          | 1:1,000                 |
| Ki-67                   | Proliferative cells                                  | DAKO, A0047                                       | 1:300                   |
| Dclk1                   | Tuft cells                                           | Abcam,<br>ab109029                                | 1:1,000                 |
| Pdx1                    | Antral gland cells                                   | Gift from<br>Christopher<br>Wright,<br>Vanderbilt | 1:500                   |
| Sox2                    | Gastric stem cells                                   | Santa Cruz,<br>SC-17320                           | 1:300                   |

**SUPPLEMENTAL TABLE 2.** List of primary antibodies used in this study with sources and working dilutions.
